# Supplementary material for: Phosphatidylserine flipping enhances membrane curvature and negative charge required for vesicular transport
Source: PubMed Central journal article supplement — J Cell Biol. 2013 Sep 16;202(6):875–86. doi: 10.1083/jcb.201305094 (PMC3776346; doi:10.1083/jcb.201305094), 2013-09-16
Supplement: supp_jcb.201305094_JCB_201305094_sm.pdf [file supp_jcb.201305094_JCB_201305094_sm.pdf]

Xu et al., <http://www.jcb.org/cgi/content/full/jcb.201305094/DC1>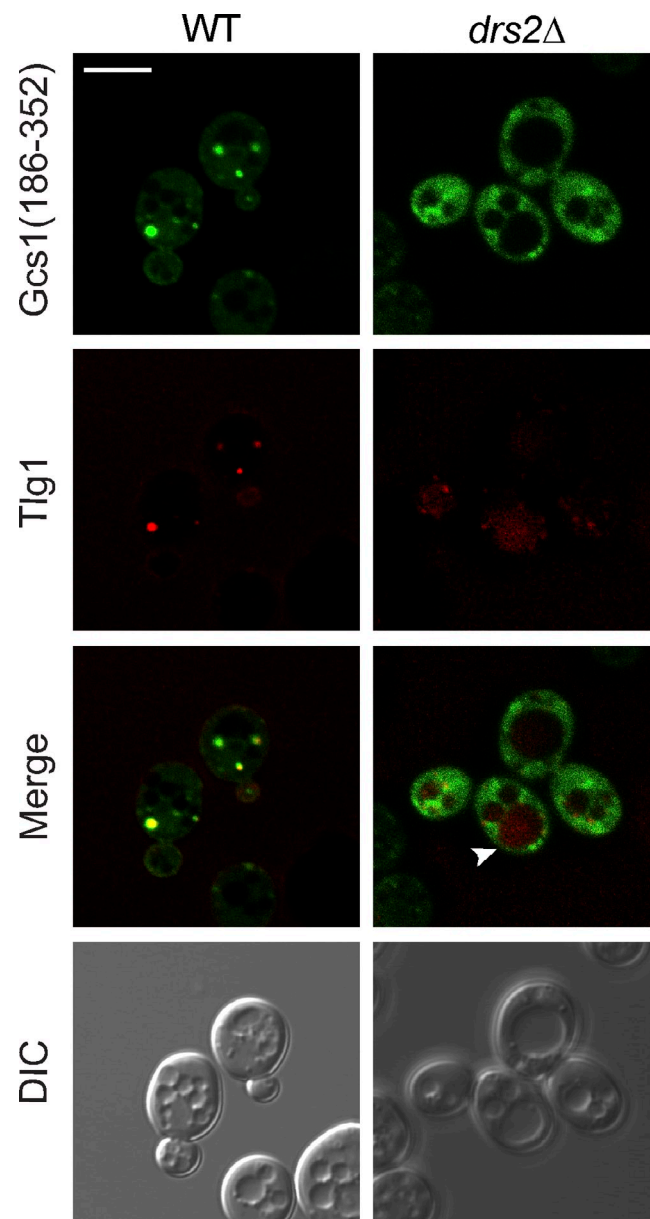

Figure S1. **mCherry-Tlg1 is partially mislocalized to the vacuole in *drs2Δ*.** The arrowhead indicates a mother cell where the mCherry-Tlg1 is mislocalized to the vacuole. The two *drs2Δ* buds in this field show localization of mCherry to an enlarged organelle outside of the vacuole. Bar, 5  $\mu$ m.

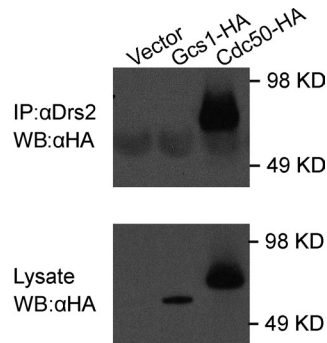

Figure S2. **Drs2 does not physically interact with Gcs1.** The lysates from cells expressing HA-tagged Gcs1 and Cdc50 were immunoprecipitated (IP) with anti-Drs2 antibodies, and the Western blot was probed with anti-HA antibody.

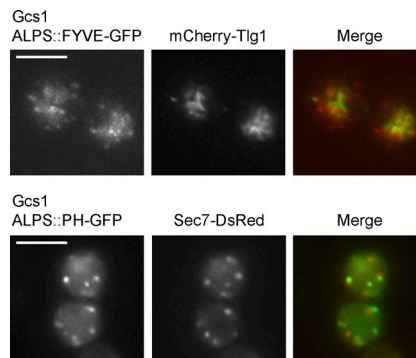

Figure S3. **GFP-tagged GCS1-ALPS::FYVE in wild-type cells were imaged relative to the TGN/EE marker mCherry-Tlg1, and GFP-tagged GCS1-ALPS::PH were imaged relative to the TGN marker Sec7-DsRed.** Bars, 5  $\mu$ m.

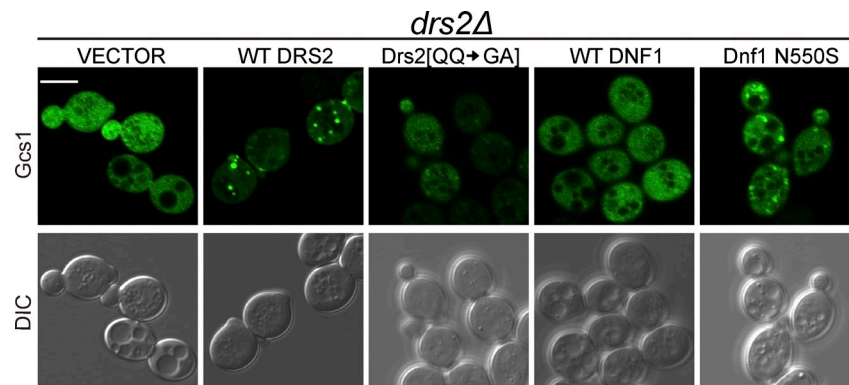

Figure S4. **Gcs1-GFP localization to membranes is restored in *drs2Δ* cells expressing wild-type (WT) Drs2, but not the PS-deficient Drs2 [QQ → GA] mutant.** An extra copy of WT Dnf1 failed to suppress the Gcs1-GFP localization defect, but the Dnf1 N550S mutant that can flip PS restored Gcs1-GFP endosome localization. Bar, 5  $\mu$ m.

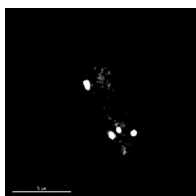

Video 1. **Membrane dynamics labeled with GFP-Tlg1 in wild-type cells.** Wild-type cells transformed with GFP-Tlg1 were grown to mid-log phase before being imaged using a DeltaVision Elite workstation (Applied Precision). Frames were taken every 170 ms for several seconds (see Materials and methods for more details on image acquisition).

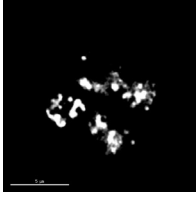

Video 2. **Membrane dynamics labeled with GFP-Tlg1 in *drs2Δ* cells.** *drs2Δ* cells transformed with GFP-Tlg1 were grown to mid-log phase before being imaged using a DeltaVision Elite workstation (Applied Precision). Frames were taken every 170 ms for several seconds (see Materials and methods for more details on image acquisition).

Table S1. **Yeast strains used in this study**

| Strain         | Genotype                                  | Reference            |
|----------------|-------------------------------------------|----------------------|
| BY4741         | <i>MATa his3 leu2 ura3 met15</i>          | Invitrogen           |
| BY4742         | <i>MATα his3Δ1 leu2Δ0 ura3Δ0 lys2Δ0</i>   | Invitrogen           |
| ZHY615M2D      | BY4742 <i>drs2Δ::KanMX6</i>               | Hua et al., 2002     |
| BY4742 YJL036W | BY4742 <i>snx4Δ::KanMX6</i>               | Invitrogen           |
| BY4742 YDL226C | BY4742 <i>gcs1Δ::KanMX6</i>               | Invitrogen           |
| BY4741 YLR240W | BY4741 <i>vps34Δ::KanMX6</i>              | Invitrogen           |
| BY4742 YFR019W | BY4742 <i>fab1Δ::KanMX6</i>               | Invitrogen           |
| KLY022         | BY4741 <i>drs2Δ::KanMX6 chs6Δ::KanMX6</i> | Liu et al., 2008     |
| RBY8700        | BY4741 <i>cho1Δ::natNT2</i>               | Baldrige et al. 2013 |

Table S2. **Plasmids used in this study**

| Plasmid                                        | Description                       | Reference                 |
|------------------------------------------------|-----------------------------------|---------------------------|
| pRS315                                         | <i>LEU2 CEN</i>                   | ATCC                      |
| pRS313                                         | <i>HIS3</i>                       | ATCC                      |
| pRS416                                         | <i>URA CEN</i>                    | ATCC                      |
| pRS416-mCherry-Tlg1                            | Tlg1 tagged mCherry               | From David Katzman        |
| pRS315-mCherry-Tlg1                            | Tlg1 tagged mCherry               | This study                |
| pRS313-mCherry-Tlg1                            | Tlg1 tagged mCherry               | This study                |
| pRS416-ADH                                     | ADH promoter URA CEN              | Mumberg et al., 1995      |
| pRS416-ADH-Gcs1-GFP                            | Gcs1 tagged with GFP              | This study                |
| pRS416-ADH-Gcs1 <sup>L246D</sup> -GFP          | Gcs1 ALPS mutant                  | This study                |
| pRS416-ADH-Gcs1(216-352)-GFP                   | truncated Gcs1                    | This study                |
| pRS416-ADH-Gcs1(186-352)-GFP                   | truncated Gcs1                    | This study                |
| pRS416-ADH-Gcs1(242-352)-GFP                   | truncated Gcs1                    | This study                |
| pRS416-ADH-Gcs1(186-285)-GFP                   | truncated Gcs1                    | This study                |
| pRS416-ADH-Gcs1(186-285) <sup>R199Q</sup> -GFP | R199Q                             | This study                |
| pRS416-ADH-Gcs1(186-285) <sup>K210Q</sup> -GFP | K210Q                             | This study                |
| pGST-Gcs1(186-352)                             | Gcs1(186-352) tagged GST          | This study                |
| pGST-Gcs1(186-285)                             | Gcs1(186-285) tagged GST          | This study                |
| pGST-Gcs1(186-285) <sup>K210Q</sup>            | Gcs1(186-285) mutant tagged GST   | This study                |
| pRS416-ADH-GCS1-ALPS::FYVE-GFP                 | GCS1-GFP ALPS replaced FYVE       | This study                |
| pRS416-ADH-GCS1-ALPS::PH-GFP                   | GCS1-GFP ALPS replaced PH         | This study                |
| pRS315-GCS1                                    | GCS1 LEU2 CEN                     | Pak Poon                  |
| pRS315-GCS1 GAP(R54K)                          | GCS1 catalytic dead mutant        | This study                |
| pRS315-GCS1 ALPS(L246D)                        | GCS1 ALPS mutant                  | This study                |
| pRS315-GCS1-ALPS::FYVE                         | GCS1 ALPS replaced by FYVE domain | This study                |
| pRS315-GCS1-ALPS::PH                           | GCS1 ALPS replaced by PH domain   | This study                |
| pRS416-GFP-Snc1                                | Snc1 tagged GFP                   | Lewis et al., 2000        |
| pRS315-DRS2                                    | DRS2                              | Gall et al., 2002         |
| pRS315-drs2 <sup>ts</sup>                      | drs2 <sup>ts</sup>                | Gall et al., 2002         |
| pRS416-GPD-GFP-Lact-C2                         | PS biosensor                      | Fairn et al., 2011        |
| pRS425-GPD-mRFP-Lact-C2                        | PS biosensor                      | Fairn et al., 2011        |
| pRS313-DRS2                                    | DRS2                              | Natarajan, et al., 2004   |
| pRS313-Drs2 [QQ->GA]                           | PS-deficient DRS2 mutant          | Baldrige et al., 2013     |
| pRS313-DNF1                                    | DNF1                              | Liu et al., 2008          |
| pRS313-Dnf1 N550S                              | DNF1 mutant                       | Baldrige et al., 2013     |
| pRS313-GPD-3xFLAG-DNF1                         |                                   | Baldrige and Graham, 2012 |
| pRS425-LEM3                                    |                                   | Baldrige and Graham, 2012 |
| pRS313-GPD-DRS2                                |                                   | Baldrige and Graham, 2012 |
| pRS425-CDC50                                   |                                   | Baldrige and Graham, 2012 |
| pCB866                                         | 2 $\mu$ . Osh4-YFP::HIS3MX        | Alfaro et al., 2011       |

ATCC, American Type Culture Collection.

## References

- Alfaro, G., J. Johansen, S.A. Dighe, G. Duamel, K.G. Kozminski, and C.T. Beh. 2011. The sterol-binding protein Kes1/Osh4p is a regulator of polarized exocytosis. *Traffic*. 12:1521–1536. <http://dx.doi.org/10.1111/j.1600-0854.2011.01265.x>
- Baldrige, R.D., and T.R. Graham. 2012. Identification of residues defining phospholipid flippase substrate specificity of type IV P-type ATPases. *Proc. Natl. Acad. Sci. USA*. 109:E290–E298. <http://dx.doi.org/10.1073/pnas.1115725109>
- Baldrige, R.D., and T.R. Graham. 2013. Two-gate mechanism for phospholipid selection and transport by type IV P-type ATPases. *Proc. Natl. Acad. Sci. USA*. 110:E358–E367. <http://dx.doi.org/10.1073/pnas.1216948110>
- Baldrige, R.D., P. Xu, and T.R. Graham. 2013. Type IV P-type ATPases distinguish mono- versus diacyl phosphatidylserine using a cytofacial exit gate in the membrane domain. *J. Biol. Chem.* 288:19516–19527. <http://dx.doi.org/10.1074/jbc.M113.476911>
- Chen, C.Y., M.F. Ingram, P.H. Rosal, and T.R. Graham. 1999. Role for Drs2p, a P-type ATPase and potential aminophospholipid translocase, in yeast late Golgi function. *J. Cell Biol.* 147:1223–1236. <http://dx.doi.org/10.1083/jcb.147.6.1223>
- Fairn, G.D., M. Hermansson, P. Somerharju, and S. Grinstein. 2011. Phosphatidylserine is polarized and required for proper Cdc42 localization and for development of cell polarity. *Nat. Cell Biol.* 13:1424–1430. <http://dx.doi.org/10.1038/ncb2351>
- Gall, W.E., N.C. Geething, Z. Hua, M.F. Ingram, K. Liu, S.I. Chen, and T.R. Graham. 2002. Drs2p-dependent formation of exocytic clathrin-coated vesicles in vivo. *Curr. Biol.* 12:1623–1627. [http://dx.doi.org/10.1016/S0960-9822\(02\)01148-X](http://dx.doi.org/10.1016/S0960-9822(02)01148-X)
- Hua, Z., P. Fatheddin, and T.R. Graham. 2002. An essential subfamily of Drs2p-related P-type ATPases is required for protein trafficking between Golgi complex and endosomal/vacuolar system. *Mol. Biol. Cell.* 13:3162–3177. <http://dx.doi.org/10.1091/mbc.E02-03-0172>
- Lewis, M.J., B.J. Nichols, C. Prescianotto-Baschong, H. Riezman, and H.R. Pelham. 2000. Specific retrieval of the exocytic SNARE Snc1p from early yeast endosomes. *Mol. Biol. Cell.* 11:23–38. <http://dx.doi.org/10.1091/mbc.11.1.23>
- Liu, K., K. Surendhran, S.F. Nothwehr, and T.R. Graham. 2008. P4-ATPase requirement for AP-1/clathrin function in protein transport from the trans-Golgi network and early endosomes. *Mol. Biol. Cell.* 19:3526–3535. <http://dx.doi.org/10.1091/mbc.E08-01-0025>
- Mumberg, D., R. Müller, and M. Funk. 1995. Yeast vectors for the controlled expression of heterologous proteins in different genetic backgrounds. *Gene*. 156:119–122. [http://dx.doi.org/10.1016/0378-1119\(95\)00037-7](http://dx.doi.org/10.1016/0378-1119(95)00037-7)
- Natarajan, P., J. Wang, Z. Hua, and T.R. Graham. 2004. Drs2p-coupled aminophospholipid translocase activity in yeast Golgi membranes and relationship to in vivo function. *Proc. Natl. Acad. Sci. USA*. 101:10614–10619. <http://dx.doi.org/10.1073/pnas.0404146101>
- Poon, P.P., X. Wang, M. Rotman, I. Huber, E. Cukierman, D. Cassel, R.A. Singer, and G.C. Johnston. 1996. *Saccharomyces cerevisiae* Gcs1 is an ADP-ribosylation factor GTPase-activating protein. *Proc. Natl. Acad. Sci. USA*. 93:10074–10077. <http://dx.doi.org/10.1073/pnas.93.19.10074>
